# Supplementary material for: Efficient asymmetric syntheses of α-quaternary lactones and esters through chiral bifunctional sulfide-catalyzed desymmetrizing bromolactonization of α,α-diallyl carboxylic acids
Source: Royal Society of Chemistry journal article supplement (doi:10.1039/d1cc03874e), 2021-01-01
Supplement: d1cc03874e1.pdf [file d1cc03874e1.pdf]

## Supplementary Information

### Efficient asymmetric syntheses of $\alpha$ -quaternary lactones and esters through chiral bifunctional sulfide-catalyzed desymmetrizing bromolactonization of $\alpha,\alpha$ -diallyl carboxylic acids

Mana Hiraki,<sup>a</sup> Ken Okuno,<sup>a</sup> Ryuichi Nishiyori,<sup>a</sup> Ahmed A. Noser<sup>a,b</sup>  
and Seiji Shirakawa<sup>\*a</sup>

<sup>a</sup>*Department of Environmental Science, Graduate School of Fisheries and Environmental Sciences,  
Nagasaki University, 1-14, Bunkyo-machi, Nagasaki 852-8521, Japan*

\*E-mail: seijishirakawa@nagasaki-u.ac.jp

<sup>b</sup>*Department of Chemistry, Faculty of Science, Tanta University, Tanta 31527, Egypt*

### Table of Contents

|                                                                                            |      |
|--------------------------------------------------------------------------------------------|------|
| <b>General Information</b>                                                                 | S-2  |
| <b>Acknowledgements</b>                                                                    | S-2  |
| <b>Tables S1 and S2</b>                                                                    | S-3  |
| <b>Schemes S1 and S2</b>                                                                   | S-4  |
| <b>Scheme S3</b>                                                                           | S-5  |
| <b>Experimental Section</b>                                                                | S-6  |
| 1. Synthesis of catalysts                                                                  | S-6  |
| 2. Synthesis of substrates                                                                 | S-6  |
| 3. General procedure for stereoselective desymmetrizing<br>bromolactonizations of <b>1</b> | S-9  |
| 4. Transformations of products <b>2a</b> and <b>8</b>                                      | S-16 |
| 5. General procedure for the synthesis of $\alpha$ -quaternary esters <b>13</b>            | S-18 |
| 6. Determination of the absolute configuration of products                                 | S-20 |
| <b>References</b>                                                                          | S-20 |
| <b>NMR Charts</b>                                                                          | S-21 |
| <b>HPLC Charts</b>                                                                         | S-60 |

## General Information

<sup>1</sup>H and <sup>13</sup>C NMR spectra were measured on JEOL JNM-AL 400 and JEOL JNM-ECZ 400R NMR instruments (400 MHz for <sup>1</sup>H NMR, 100 MHz for <sup>13</sup>C NMR). Tetramethylsilane (TMS) served as the internal standard (0 ppm) for <sup>1</sup>H NMR, and CDCl<sub>3</sub> served as the internal standard (77.0 ppm) for <sup>13</sup>C NMR. The following abbreviations were used to express the multiplicities: s = singlet; d = doublet; t = triplet; m = multiplet; br = broad. High-resolution mass spectra (HRMS) were measured on a JEOL JMS-700N. Infrared spectra (IR) were measured on a JASCO FT/IR-4200 spectrometer. Optical rotations were measured on a JASCO P-2100 polarimeter. High performance liquid chromatography (HPLC) was performed on Shimadzu LC-20AT and SPD-20A instruments using Daicel Chiralpak IA-3, IB-3, IC-3, ID-3, IF-3, IG-3, or Chiralcel OD-3 columns (4.6 mm × 250 mm). All reactions were monitored by thin-layer chromatography using Merck precoated TLC plates (silica gel 60GF-254, 0.25 mm), with visualization by the use of UV lamp (254 nm) or dyes. The products were purified by flash column chromatography on silica gel. Dehydrated solvents were purchased from Kanto Chemical.

## Acknowledgements

This work was supported by JSPS KAKENHI Grant Numbers JP19K05480 (for S. S.) and JP21J20978 (for R. N.), by the Cooperative Research Program of “Network Joint Research Center for Materials and Devices” (20211315 for S. S.), and by the Takahashi Industrial and Economic Research Foundation (for S. S.). R. N. thanks JSPS for a research fellowship. A. A. N. thanks the Embassy of the Arab Republic of Egypt for a research fellowship.

**Table S1** Optimization of reaction solvents<sup>a</sup>

| Entry | Solvent                                                   | Yield <sup>b</sup> (%) | dr <sup>c</sup> | er <sup>d</sup> |
|-------|-----------------------------------------------------------|------------------------|-----------------|-----------------|
| 1     | CH <sub>2</sub> Cl <sub>2</sub> (2.0 mL)                  | 99                     | >20: 1          | 88:12           |
| 2     | toluene (2.0 mL)                                          | 60                     | 14: 1           | 82:18           |
| 3     | toluene (1.0 mL)-CH <sub>2</sub> Cl <sub>2</sub> (1.0 mL) | 98                     | >20: 1          | 93: 7           |
| 4     | hexane (1.0 mL)-CH <sub>2</sub> Cl <sub>2</sub> (1.0 mL)  | 99                     | >20: 1          | 91: 9           |
| 5     | toluene (1.5 mL)-CH <sub>2</sub> Cl <sub>2</sub> (0.5 mL) | 99                     | >20: 1          | 94: 6           |

<sup>a</sup> Reaction conditions: **1a** (0.10 mmol), NBP (0.12 mmol), (*S*)-**4b** (10 mol %, 0.010 mmol), solvent (2.0 mL), -78 °C, 24 h. <sup>b</sup> Yield of isolated product **2a**. <sup>c</sup> The diastereomeric ratio (dr) was determined via <sup>1</sup>H NMR analysis. <sup>d</sup> The enantiomeric ratio (er) was determined via HPLC analysis on a chiral stationary phase.

**Table S2** Effect of brominating reagents<sup>a</sup>

| Entry | Brominating reagent | Yield <sup>b</sup> (%) | dr <sup>c</sup> | er <sup>d</sup> |
|-------|---------------------|------------------------|-----------------|-----------------|
| 1     | NBP                 | 99                     | >20: 1          | 94: 6           |
| 2     | NBS                 | 96                     | >20: 1          | 91: 9           |
| 3     | DBH                 | 98                     | >20: 1          | 94: 6           |
| 4     | NBSac               | 94                     | >20: 1          | 93: 7           |
| 5     | DBI                 | 64                     | 9: 1            | 70:30           |
| 6     | TBCO                | 89                     | >20: 1          | 92: 8           |
| 7     | NBA                 | 93                     | >20: 1          | 92: 8           |
| 8     | Br <sub>2</sub>     | 89                     | 12: 1           | 53:47           |

<sup>a</sup> Reaction conditions: **1a** (0.10 mmol), brominating reagent (0.12 mmol), (*S*)-**4b** (10 mol %, 0.010 mmol), toluene (1.5 mL)-CH<sub>2</sub>Cl<sub>2</sub> (0.5 mL), -78 °C, 24 h. <sup>b</sup> Yield of isolated product **2a**. <sup>c</sup> The diastereomeric ratio (dr) was determined via <sup>1</sup>H NMR analysis. <sup>d</sup> The enantiomeric ratio (er) was determined via HPLC analysis on a chiral stationary phase.



**Scheme S1** Effect of chiral catalysts.



**Scheme S2** Additional substrate scope.

When a reaction of **1n** was performed in the absence of a catalyst, product **2n** was obtained in a low yield with poor diastereoselectivity (1.1: 1 dr). Unfortunately, the reactions using chiral bifunctional sulfide catalysts did not improve the low diastereoselectivity of **2n**, although moderate levels of enantioselectivity were observed.



**Scheme S3** Optimization of reaction conditions for substrate **1n**.

## Experimental Section

### 1. Synthesis of catalysts

Chiral sulfide catalysts (*S*)-**3**, (*S*)-**4a–4e**, (*S*)-**5**, and (*S*)-**14** were prepared according to the literature.<sup>1</sup>

### 2. Synthesis of substrates

Substrates **1** were prepared according to the literature method.<sup>2</sup> Substrate **7** was also prepared according to the literature method.<sup>3</sup>



**1b**: <sup>1</sup>H NMR (400 MHz, CDCl<sub>3</sub>) δ 7.33 (d, *J* = 8.8 Hz, 2H), 7.25 (d, *J* = 8.8 Hz, 2H), 5.59–5.48 (m, 2H), 5.11–5.07 (m, 4H), 2.80 (dd, *J* = 7.6, 14.0 Hz, 2H), 2.73 (dd, *J* = 6.8, 13.6 Hz, 2H); <sup>13</sup>C NMR (100 MHz, CDCl<sub>3</sub>) δ 181.1, 139.4, 133.1, 132.6, 128.6, 128.0, 119.2, 53.1, 38.5; IR (neat): 3078, 3007, 2980, 2921, 1700, 1494, 1282, 1234, 1096, 1013, 995, 918, 826, 754, 725 cm<sup>-1</sup>; HRMS (FAB) calcd for C<sub>14</sub>H<sub>15</sub>ClO<sub>2</sub>: 250.0761 ([M]<sup>+</sup>), found 250.0761.



**1c**: <sup>1</sup>H NMR (400 MHz, CDCl<sub>3</sub>) δ 7.28 (dd, *J* = 5.4, 9.0 Hz, 2H), 7.04 (dd, *J* = 8.8, 8.8 Hz, 2H), 5.59–5.49 (m, 2H), 5.11–5.07 (m, 4H), 2.81 (dd, *J* = 7.8, 13.8 Hz, 2H), 2.73 (dd, *J* = 6.8, 13.6 Hz, 2H); <sup>13</sup>C NMR (100 MHz, CDCl<sub>3</sub>) δ 181.2, 161.7 (d, *J* = 245 Hz), 136.6 (d, *J* = 3.3 Hz), 132.7, 128.3 (d, *J* = 8.3 Hz), 119.1, 115.3 (d, *J* = 21.4 Hz), 52.9, 38.7; IR (neat): 3079, 2981, 2922, 1699, 1509, 1282, 1234, 1165, 995, 917, 832, 815, 734, 679, 650 cm<sup>-1</sup>; HRMS (FAB) calcd for C<sub>14</sub>H<sub>15</sub>FO<sub>2</sub>: 234.1056 ([M]<sup>+</sup>), found 234.1056.



**1d**: <sup>1</sup>H NMR (400 MHz, CDCl<sub>3</sub>) δ 7.20 (d, *J* = 8.4 Hz, 2H), 7.16 (d, *J* = 8.8 Hz, 2H), 5.61–5.50 (m, 2H), 5.11–5.05 (m, 4H), 2.81 (dd, *J* = 7.6, 13.6 Hz, 2H), 2.75 (dd, *J* = 6.8, 14.0 Hz, 2H), 2.34 (s, 3H); <sup>13</sup>C NMR (100 MHz, CDCl<sub>3</sub>) δ 181.1, 137.9, 136.8, 133.2, 129.2, 126.4, 118.8, 52.9, 38.5, 21.0; IR (neat): 3077, 3007, 2980, 2947, 2923, 1698, 1515, 1282, 1234, 1132, 995, 915, 819, 730 cm<sup>-1</sup>; HRMS (FAB) calcd for C<sub>15</sub>H<sub>18</sub>O<sub>2</sub>: 230.1307 ([M]<sup>+</sup>), found 230.1307.



**1e:**  $^1\text{H}$  NMR (400 MHz,  $\text{CDCl}_3$ )  $\delta$  7.24 (d,  $J = 8.8$  Hz, 2H), 6.88 (d,  $J = 8.8$  Hz, 2H), 5.60–5.50 (m, 2H), 5.11–5.05 (m, 4H), 3.80 (s, 3H), 2.81 (dd,  $J = 7.6, 14.0$  Hz, 2H), 2.73 (dd,  $J = 6.8, 14.0$  Hz, 2H);  $^{13}\text{C}$  NMR (100 MHz,  $\text{CDCl}_3$ )  $\delta$  180.9, 158.5, 133.2, 132.9, 127.6, 118.8, 113.8, 55.2, 52.5, 38.5; IR (neat): 3077, 3004, 2979, 2954, 2936, 1699, 1514, 1292, 1252, 1185, 1035, 918, 830  $\text{cm}^{-1}$ ; HRMS (FAB) calcd for  $\text{C}_{15}\text{H}_{18}\text{O}_3$ : 246.1256 ( $[\text{M}]^+$ ), found 246.1256.



**1f:**  $^1\text{H}$  NMR (400 MHz,  $\text{CDCl}_3$ )  $\delta$  7.61 (d,  $J = 8.4$  Hz, 2H), 7.43 (d,  $J = 8.0$  Hz, 2H), 5.58–5.48 (m, 2H), 5.12–5.08 (m, 4H), 2.84 (dd,  $J = 8.0, 14.0$  Hz, 2H), 2.77 (dd,  $J = 6.8, 13.6$  Hz, 2H);  $^{13}\text{C}$  NMR (100 MHz,  $\text{CDCl}_3$ )  $\delta$  180.7, 144.9, 132.3, 129.5 (q,  $J = 32.1$  Hz), 127.1, 125.4 (q,  $J = 3.3$  Hz), 124.0 (q,  $J = 271$  Hz), 119.5, 53.7, 38.7; IR (neat): 3081, 2983, 1703, 1326, 1167, 1122, 1071, 1017, 920, 838  $\text{cm}^{-1}$ ; HRMS (FAB) calcd for  $\text{C}_{15}\text{H}_{15}\text{F}_3\text{O}_2$ : 284.1024 ( $[\text{M}]^+$ ), found 284.1024.



**1g:**  $^1\text{H}$  NMR (400 MHz,  $\text{CDCl}_3$ )  $\delta$  7.34 (d,  $J = 8.8$  Hz, 2H), 7.20 (d,  $J = 8.8$  Hz, 2H), 5.59–5.48 (m, 2H), 5.12–5.07 (m, 4H), 2.82 (dd,  $J = 8.0, 14.0$  Hz, 2H), 2.74 (dd,  $J = 6.8, 13.6$  Hz, 2H);  $^{13}\text{C}$  NMR (100 MHz,  $\text{CDCl}_3$ )  $\delta$  180.7, 148.2 (q,  $J = 1.7$  Hz), 139.5, 132.5, 128.1, 120.7, 120.4 (q,  $J = 256$  Hz), 119.3, 53.1, 38.7; IR (neat): 3080, 2983, 2925, 1703, 1510, 1254, 1212, 1162, 1116, 1019, 995, 920, 849, 686  $\text{cm}^{-1}$ ; HRMS (FAB) calcd for  $\text{C}_{15}\text{H}_{15}\text{F}_3\text{O}_3$ : 300.0973 ( $[\text{M}]^+$ ), found 300.0974.



**1h:**  $^1\text{H}$  NMR (400 MHz,  $\text{CDCl}_3$ )  $\delta$  7.31–7.25 (m, 3H), 7.20 (td,  $J = 2.0, 7.2$  Hz, 1H), 5.59–5.49 (m, 2H), 5.13–5.08 (m, 4H), 2.81 (dd,  $J = 7.6, 14.0$  Hz, 2H), 2.74 (dd,  $J = 6.8, 13.6$  Hz, 2H);  $^{13}\text{C}$  NMR (100 MHz,  $\text{CDCl}_3$ )  $\delta$  180.7, 143.0, 134.5, 132.5, 129.7, 127.4, 126.9, 124.9, 119.4, 53.4, 38.5; IR (neat): 3078, 2980, 1699, 1594, 1573, 1282, 1234, 996, 918, 848, 771, 712, 687, 649  $\text{cm}^{-1}$ ; HRMS (FAB) calcd for  $\text{C}_{14}\text{H}_{16}\text{ClO}_2$ : 251.0839 ( $[\text{M}+\text{H}]^+$ ), found 251.0839.



**1i:**  $^1\text{H}$  NMR (400 MHz,  $\text{CDCl}_3$ )  $\delta$  7.23 (d,  $J = 8.0$  Hz, 1H), 7.12–7.08 (m, 3H), 5.60–5.50 (m, 2H), 5.12–5.06 (m, 4H), 2.82 (dd,  $J = 7.6, 13.6$  Hz, 2H), 2.75 (dd,  $J = 6.8, 14.0$  Hz, 2H), 2.36 (s, 3H);  $^{13}\text{C}$  NMR (100 MHz,  $\text{CDCl}_3$ )  $\delta$  181.3, 140.8, 138.0, 133.2, 128.3, 127.9, 127.2, 123.5, 118.8, 53.2, 38.5, 21.6; IR (neat): 3077, 3007, 2979, 2947, 2923, 1698, 1640, 1606, 1442, 1284, 1234, 995, 915, 776, 721, 705, 650  $\text{cm}^{-1}$ ; HRMS (FAB) calcd for  $\text{C}_{15}\text{H}_{19}\text{O}_2$ : 231.1385 ( $[\text{M}+\text{H}]^+$ ), found 231.1377.



**1j:**  $^1\text{H}$  NMR (400 MHz,  $\text{CDCl}_3$ )  $\delta$  7.30–7.23 (m, 2H), 7.14 (dd,  $J = 6.8, 7.6$  Hz, 1H), 7.05 (dd,  $J = 8.4, 10.8$  Hz, 1H), 5.61–5.51 (m, 2H), 5.10–5.06 (m, 4H), 2.81 (dd,  $J = 6.8, 14.0$  Hz, 2H), 2.73 (dd,  $J = 8.0, 14.0$  Hz, 2H);  $^{13}\text{C}$  NMR (100 MHz,  $\text{CDCl}_3$ )  $\delta$  180.5, 160.5 (d,  $J = 245$  Hz), 132.6, 129.0 (d,  $J = 13.2$  Hz), 128.9 (d,  $J = 9.1$  Hz), 127.8 (d,  $J = 4.1$  Hz), 123.8 (d,  $J = 3.3$  Hz), 119.1, 115.7 (d,  $J = 22.2$  Hz), 50.9, 38.1; IR (neat): 3082, 3009, 2982, 2926, 2876, 1698, 1488, 1446, 1300, 1286, 1241, 1217, 996, 920, 811, 755, 745, 686  $\text{cm}^{-1}$ ; HRMS (FAB) calcd for  $\text{C}_{14}\text{H}_{15}\text{FO}_2$ : 234.1056 ( $[\text{M}]^+$ ), found 234.1056.



**1k:**  $^1\text{H}$  NMR (400 MHz,  $\text{CDCl}_3$ )  $\delta$  7.84–7.75 (m, 4H), 7.51–7.42 (m, 3H), 5.63–5.52 (m, 2H), 5.14–5.06 (m, 4H), 2.94 (dd,  $J = 7.6, 14.0$  Hz, 2H), 2.89 (dd,  $J = 6.8, 13.6$  Hz, 2H);  $^{13}\text{C}$  NMR (100 MHz,  $\text{CDCl}_3$ )  $\delta$  180.6, 138.3, 133.1, 133.0, 132.4, 128.21, 128.15, 127.5, 126.2, 126.1, 125.4, 124.8, 119.0, 53.5, 38.5; IR (neat): 3075, 3061, 3007, 2979, 2923, 1698, 1639, 1282, 1233, 1136, 995, 917, 855, 817, 747  $\text{cm}^{-1}$ ; HRMS (FAB) calcd for  $\text{C}_{18}\text{H}_{18}\text{O}_2$ : 266.1307 ( $[\text{M}]^+$ ), found 266.1306.



**1l:**  $^1\text{H}$  NMR (400 MHz,  $\text{CDCl}_3$ )  $\delta$  7.25 (dd,  $J = 0.8, 4.8$  Hz, 1H), 7.01–6.97 (m, 2H), 5.69–5.59 (m, 2H), 5.15–5.09 (m, 4H), 2.89 (dd,  $J = 7.2, 13.6$  Hz, 2H), 2.80 (dd,  $J = 7.2, 14.0$  Hz, 2H);  $^{13}\text{C}$  NMR (100 MHz,  $\text{CDCl}_3$ )  $\delta$  180.0, 145.0, 132.6, 126.6, 125.1, 124.6, 119.2, 51.7, 40.2; IR (neat): 3074, 3010, 2979, 2964, 2911, 1697, 1641, 1447, 1405, 1294, 1280, 1243, 1230, 996, 926, 889, 852, 703  $\text{cm}^{-1}$ .



**1m:**<sup>5</sup> <sup>1</sup>H NMR (400 MHz, CDCl<sub>3</sub>) δ 7.31 (dd, *J* = 2.8, 4.8 Hz, 1H), 7.16 (dd, *J* = 1.2, 2.8 Hz, 1H), 7.06 (dd, *J* = 1.2, 4.8 Hz, 1H), 5.64–5.54 (m, 2H), 5.13–5.07 (m, 4H), 2.82 (dd, *J* = 7.6, 14.0 Hz, 2H), 2.75 (dd, *J* = 7.2, 14.0 Hz, 2H); <sup>13</sup>C NMR (100 MHz, CDCl<sub>3</sub>) δ 180.9, 141.7, 132.9, 126.6, 125.6, 121.6, 118.9, 51.3, 39.0; IR (neat): 3080, 2981, 2954, 2925, 1699, 1281, 1235, 904, 863, 771, 727, 693, 649, 623 cm<sup>-1</sup>.



**1n:** <sup>1</sup>H NMR (400 MHz, CDCl<sub>3</sub>) δ 7.27 (t, *J* = 7.4 Hz, 2H), 7.20–7.16 (m, 3H), 5.84–5.74 (m, 2H), 5.20–5.13 (m, 4H), 2.61–2.57 (m, 2H), 2.44 (d, *J* = 7.2 Hz, 4H), 1.90–1.86 (m, 2H); <sup>13</sup>C NMR (100 MHz, CDCl<sub>3</sub>) δ 182.4, 141.9, 133.1, 128.4, 128.3, 125.9, 118.7, 49.2, 38.6, 37.1, 30.5; IR (neat): 3078, 3027, 2979, 2929, 1697, 1455, 1231, 994, 907, 730, 698 cm<sup>-1</sup>; HRMS (FAB) calcd for C<sub>16</sub>H<sub>20</sub>O<sub>2</sub>: 244.1463 ([M]<sup>+</sup>), found 244.1462.



**1o:** <sup>1</sup>H NMR (400 MHz, CDCl<sub>3</sub>) δ 7.29–7.18 (m, 5H), 5.90–5.80 (m, 2H), 5.19–5.14 (m, 4H), 2.94 (s, 2H), 2.42 (dd, *J* = 7.2, 14.4 Hz, 2H), 2.31 (dd, *J* = 7.6, 14.4 Hz, 2H); <sup>13</sup>C NMR (100 MHz, CDCl<sub>3</sub>) δ 182.0, 137.0, 133.3, 130.1, 128.2, 126.7, 118.9, 50.7, 41.1, 38.1; IR (neat): 3077, 3031, 2979, 2924, 1698, 1639, 1454, 1446, 1282, 1248, 1232, 992, 916, 737, 701 cm<sup>-1</sup>; HRMS (FAB) calcd for C<sub>15</sub>H<sub>18</sub>O<sub>2</sub>: 230.1307 ([M]<sup>+</sup>), found 230.1305.

### 3. General procedure for stereoselective desymmetrizing bromolactonizations of **1**

A solution of substrate **1** (0.10 mmol) and catalyst (*S*)-**4c** (10 mol %, 0.010 mmol) in toluene (1.5 mL)-CH<sub>2</sub>Cl<sub>2</sub> (0.5 mL) was cooled to –78 °C. After stirring for 10 min at –78 °C, *N*-bromophthalimide (NBP) (0.12 mmol) was added to the cooled reaction solution. The reaction mixture was stirred for 24 h at –78 °C. After 24 h, the reaction mixture was quenched with saturated aqueous Na<sub>2</sub>SO<sub>3</sub> (4.0 mL) at –78 °C and stirred for 10 min at –78 °C. The quenched reaction mixture was diluted with CH<sub>2</sub>Cl<sub>2</sub> (2 mL) and H<sub>2</sub>O (2 mL), and warmed to room temperature. The organic materials were extracted with CH<sub>2</sub>Cl<sub>2</sub> for three times (5 mL × 3). The combined extracts were dried over Na<sub>2</sub>SO<sub>4</sub> and concentrated. [The <sup>1</sup>H NMR analysis of the crude reaction mixture was performed at this stage to confirm diastereoselectivity.] The residue was purified by flash column

chromatography on silica gel (hexane/ethyl acetate as eluent) to give product **2**. The enantioselectivity of the product **2** was determined by HPLC analysis on a chiral stationary phase.



**2a**:<sup>2a</sup>  $[\alpha]_D^{21} +52.6$  ( $c = 0.84$ ,  $\text{CHCl}_3$ , 95: 5 er); HPLC analysis: Daicel Chiralpak IB-3, hexane/2-propanol = 50:1, flow rate = 0.5 mL/min, 214 nm; retention time: 23.1 min (minor) and 39.9 min (major).  $^1\text{H}$  NMR (400 MHz,  $\text{CDCl}_3$ )  $\delta$  7.44–7.37 (m, 4H), 7.34–7.29 (m, 1H), 5.71–5.60 (m, 1H), 5.15–5.10 (m, 2H), 4.48–4.41 (m, 1H), 3.59 (dd,  $J = 5.2, 10.8$  Hz, 1H), 3.49 (dd,  $J = 6.8, 10.8$  Hz, 1H), 2.82 (dd,  $J = 5.2, 13.2$  Hz, 1H), 2.75–2.64 (m, 2H), 2.29 (dd,  $J = 10.8, 13.2$  Hz, 1H);  $^{13}\text{C}$  NMR (100 MHz,  $\text{CDCl}_3$ )  $\delta$  177.1, 138.3, 132.7, 129.0, 127.9, 126.1, 119.8, 75.1, 53.4, 43.5, 38.2, 32.8; HRMS (FAB) calcd for  $\text{C}_{14}\text{H}_{15}\text{BrO}_2$ : 294.0255 ( $[\text{M}]^+$ ), found 294.0252.



**2b**:  $[\alpha]_D^{27} +44.8$  ( $c = 1.3$ ,  $\text{CHCl}_3$ , 92: 8 er); HPLC analysis: Daicel Chiralpak IA-3, hexane/2-propanol = 20:1, flow rate = 0.5 mL/min, 214 nm; retention time: 18.1 min (major) and 20.7 min (minor).  $^1\text{H}$  NMR (400 MHz,  $\text{CDCl}_3$ )  $\delta$  7.41–7.32 (m, 4H), 5.68–5.57 (m, 1H), 5.16–5.09 (m, 2H), 4.46–4.39 (m, 1H), 3.59 (dd,  $J = 5.2, 10.8$  Hz, 1H), 3.48 (dd,  $J = 6.8, 10.8$  Hz, 1H), 2.78 (dd,  $J = 5.2, 13.6$  Hz, 1H), 2.71–2.61 (m, 2H), 2.30 (dd,  $J = 10.8, 13.6$  Hz, 1H);  $^{13}\text{C}$  NMR (100 MHz,  $\text{CDCl}_3$ )  $\delta$  176.7, 136.8, 134.0, 132.3, 129.2, 127.6, 120.1, 75.1, 53.0, 43.6, 38.1, 32.6; IR (neat): 1768, 1494, 1173, 1012, 926, 827  $\text{cm}^{-1}$ ; HRMS (FAB) calcd for  $\text{C}_{14}\text{H}_{14}\text{BrClO}_2$ : 327.9866 ( $[\text{M}]^+$ ), found 327.9864.



**2c**:  $[\alpha]_D^{28} +48.1$  ( $c = 1.3$ ,  $\text{CHCl}_3$ , 94: 6 er); HPLC analysis: Daicel Chiralpak IA-3, hexane/2-propanol = 20:1, flow rate = 0.5 mL/min, 214 nm; retention time: 16.6 min (major) and 18.9 min (minor).  $^1\text{H}$  NMR (400 MHz,  $\text{CDCl}_3$ )  $\delta$  7.40 (dd,  $J = 5.2, 8.8$  Hz, 2H), 7.08 (dd,  $J = 8.4, 8.8$  Hz, 2H), 5.68–5.57 (m, 1H), 5.15–5.09 (m, 2H), 4.47–4.40 (m, 1H), 3.59 (dd,  $J = 5.2, 10.8$  Hz, 1H), 3.49 (dd,  $J = 6.4, 10.8$  Hz, 1H), 2.79 (dd,  $J = 5.2, 13.6$  Hz, 1H), 2.71–2.62 (m, 2H), 2.30 (dd,  $J = 10.8, 13.6$  Hz, 1H);  $^{13}\text{C}$  NMR (100 MHz,  $\text{CDCl}_3$ )  $\delta$  177.0, 162.2 (d,  $J = 246$  Hz), 133.9 (d,  $J = 3.3$  Hz), 132.4, 127.9 (d,  $J = 8.2$  Hz), 120.0, 115.9 (d,

$J = 21.4$  Hz), 75.1, 52.8, 43.8, 38.2, 32.7; IR (neat): 1769, 1509, 1235, 1174, 1166, 1013, 927, 834  $\text{cm}^{-1}$ ; HRMS (FAB) calcd for  $\text{C}_{14}\text{H}_{15}\text{BrFO}_2$ : 313.0239 ( $[\text{M}+\text{H}]^+$ ), found 313.0238.



**2d**:  $[\alpha]_{\text{D}}^{29} +37.2$  ( $c = 1.2$ ,  $\text{CHCl}_3$ , 94: 6 er); HPLC analysis: Daicel Chiralpak IA-3, hexane/2-propanol = 20:1, flow rate = 0.5 mL/min, 214 nm; retention time: 16.0 min (major) and 18.4 min (minor).  $^1\text{H}$  NMR (400 MHz,  $\text{CDCl}_3$ )  $\delta$  7.30 (d,  $J = 8.0$  Hz, 2H), 7.19 (d,  $J = 8.0$  Hz, 2H), 5.70–5.59 (m, 1H), 5.14–5.09 (m, 2H), 4.47–4.40 (m, 1H), 3.58 (dd,  $J = 4.8$ , 10.8 Hz, 1H), 3.48 (dd,  $J = 6.8$ , 10.8 Hz, 1H), 2.79 (dd,  $J = 5.6$ , 13.2 Hz, 1H), 2.72–2.62 (m, 2H), 2.34 (s, 3H), 2.26 (dd,  $J = 10.8$ , 13.2 Hz, 1H);  $^{13}\text{C}$  NMR (100 MHz,  $\text{CDCl}_3$ )  $\delta$  177.3, 137.7, 135.2, 132.9, 129.7, 126.0, 119.6, 75.1, 53.0, 43.5, 38.2, 32.8, 20.9; IR (neat): 2922, 1771, 1514, 1233, 1173, 1014, 924, 816  $\text{cm}^{-1}$ ; HRMS (FAB) calcd for  $\text{C}_{15}\text{H}_{17}\text{BrO}_2$ : 308.0412 ( $[\text{M}]^+$ ), found 308.0411.



**2e**:  $[\alpha]_{\text{D}}^{26} +46.3$  ( $c = 1.0$ ,  $\text{CHCl}_3$ , 94: 6 er); HPLC analysis: Daicel Chiralpak IA-3, hexane/2-propanol = 20:1, flow rate = 0.5 mL/min, 214 nm; retention time: 23.1 min (major) and 31.4 min (minor).  $^1\text{H}$  NMR (400 MHz,  $\text{CDCl}_3$ )  $\delta$  7.33 (d,  $J = 8.8$  Hz, 2H), 6.90 (d,  $J = 8.8$  Hz, 2H), 5.69–5.58 (m, 1H), 5.13–5.08 (m, 2H), 4.48–4.41 (m, 1H), 3.81 (s, 3H), 3.58 (dd,  $J = 4.8$ , 10.8 Hz, 1H), 3.48 (dd,  $J = 6.4$ , 10.8 Hz, 1H), 2.78 (dd,  $J = 4.8$ , 13.2 Hz, 1H), 2.66 (d,  $J = 8.0$  Hz, 2H), 2.25 (dd,  $J = 10.4$ , 13.2 Hz, 1H);  $^{13}\text{C}$  NMR (100 MHz,  $\text{CDCl}_3$ )  $\delta$  177.3, 159.1, 132.8, 130.0, 127.3, 119.6, 114.3, 75.1, 55.3, 52.6, 43.7, 38.2, 32.8; IR (neat): 1769, 1512, 1253, 1172, 1031, 1016, 1009, 925, 829  $\text{cm}^{-1}$ ; HRMS (FAB) calcd for  $\text{C}_{15}\text{H}_{18}\text{BrO}_3$ : 325.0439 ( $[\text{M}+\text{H}]^+$ ), found 325.0429.



**2f**:  $[\alpha]_{\text{D}}^{26} +38.9$  ( $c = 0.78$ ,  $\text{CHCl}_3$ , 91: 9 er); HPLC analysis: Daicel Chiralpak IA-3, hexane/2-propanol = 20:1, flow rate = 0.5 mL/min, 214 nm; retention time: 15.6 min (major) and 17.4 min (minor).  $^1\text{H}$  NMR (400 MHz,  $\text{CDCl}_3$ )  $\delta$  7.66 (d,  $J = 8.0$  Hz, 2H), 7.56 (d,  $J = 8.4$  Hz, 2H), 5.69–5.58 (m, 1H), 5.18–5.11 (m, 2H), 4.46–4.39 (m, 1H), 3.60 (dd,  $J = 4.8$ , 10.8 Hz, 1H), 3.50 (dd,  $J = 6.4$ , 10.8 Hz, 1H), 2.83 (dd,  $J = 5.2$ , 13.2 Hz, 1H), 2.75–2.65

(m, 2H), 2.36 (dd,  $J = 10.4, 13.6$  Hz, 1H);  $^{13}\text{C}$  NMR (100 MHz,  $\text{CDCl}_3$ )  $\delta$  176.5, 142.4, 132.0, 130.3 (q,  $J = 32.1$  Hz), 126.7, 126.0 (q,  $J = 4.1$  Hz), 123.8 (q,  $J = 271$  Hz), 120.4, 75.1, 53.4, 43.5, 38.0, 32.5; IR (neat): 1771, 1328, 1170, 1119, 1071, 1015  $\text{cm}^{-1}$ ; HRMS (FAB) calcd for  $\text{C}_{15}\text{H}_{15}\text{BrF}_3\text{O}_2$ : 363.0208 ( $[\text{M}+\text{H}]^+$ ), found 363.0208.



**2g**:  $[\alpha]_{\text{D}}^{27} +39.2$  ( $c = 0.94$ ,  $\text{CHCl}_3$ , 91: 9 er); HPLC analysis: Daicel Chiralpak IA-3, hexane/2-propanol = 20:1, flow rate = 0.5 mL/min, 214 nm; retention time: 13.9 min (major) and 15.6 min (minor).  $^1\text{H}$  NMR (400 MHz,  $\text{CDCl}_3$ )  $\delta$  7.46 (d,  $J = 9.2$  Hz, 2H), 7.24 (d,  $J = 8.8$  Hz, 2H), 5.68–5.58 (m, 1H), 5.17–5.10 (m, 2H), 4.48–4.41 (m, 1H), 3.60 (dd,  $J = 4.8, 10.8$  Hz, 1H), 3.49 (dd,  $J = 6.4, 10.8$  Hz, 1H), 2.80 (dd,  $J = 5.2, 13.6$  Hz, 1H), 2.73–2.62 (m, 2H), 2.32 (dd,  $J = 10.8, 13.6$  Hz, 1H);  $^{13}\text{C}$  NMR (100 MHz,  $\text{CDCl}_3$ )  $\delta$  176.7, 148.8, 136.9, 132.2, 127.8, 121.3, 120.4 (q,  $J = 257$  Hz), 120.2, 75.1, 53.0, 43.7, 38.0, 32.6; IR (neat): 1776, 1509, 1257, 1213, 1169, 1015, 926  $\text{cm}^{-1}$ ; HRMS (FAB) calcd for  $\text{C}_{15}\text{H}_{15}\text{BrF}_3\text{O}_3$ : 379.0157 ( $[\text{M}+\text{H}]^+$ ), found 379.0156.



**2h**:  $[\alpha]_{\text{D}}^{22} +53.4$  ( $c = 1.3$ ,  $\text{CHCl}_3$ , 96: 4 er); HPLC analysis: Daicel Chiralpak IA-3, hexane/2-propanol = 20:1, flow rate = 0.5 mL/min, 214 nm; retention time: 14.5 min (major) and 15.6 min (minor).  $^1\text{H}$  NMR (400 MHz,  $\text{CDCl}_3$ )  $\delta$  7.41 (s, 1H), 7.35–7.28 (m, 3H), 5.68–5.58 (m, 1H), 5.17–5.11 (m, 2H), 4.48–4.41 (m, 1H), 3.59 (dd,  $J = 5.2, 10.8$  Hz, 1H), 3.50 (dd,  $J = 6.4, 10.8$  Hz, 1H), 2.78 (dd,  $J = 5.2, 13.6$  Hz, 1H), 2.73–2.62 (m, 2H), 2.32 (dd,  $J = 10.8, 13.6$  Hz, 1H);  $^{13}\text{C}$  NMR (100 MHz,  $\text{CDCl}_3$ )  $\delta$  176.5, 140.4, 135.0, 132.2, 130.3, 128.2, 126.4, 124.4, 120.2, 75.1, 53.3, 43.5, 38.0, 32.6; IR (neat): 1777, 1173, 1016, 926  $\text{cm}^{-1}$ ; HRMS (FAB) calcd for  $\text{C}_{14}\text{H}_{15}\text{BrClO}_2$ : 328.9944 ( $[\text{M}+\text{H}]^+$ ), found 328.9939.



**2i**:  $[\alpha]_{\text{D}}^{20} +51.5$  ( $c = 1.1$ ,  $\text{CHCl}_3$ , 93: 7 er); HPLC analysis: Daicel Chiralpak IA-3, hexane/2-propanol = 20:1, flow rate = 0.5 mL/min, 214 nm; retention time: 12.1 min (major) and 13.4 min (minor).  $^1\text{H}$  NMR (400 MHz,  $\text{CDCl}_3$ )  $\delta$  7.32–7.11 (m, 4H), 5.71–5.60 (m, 1H), 5.18–5.10 (m, 2H), 4.47–4.40 (m, 1H), 3.58 (dd,  $J = 5.2, 10.4$  Hz, 1H), 3.48 (dd,  $J = 6.4, 10.4$  Hz, 1H), 2.79 (dd,  $J = 5.6, 13.2$  Hz, 1H), 2.73–2.63 (m, 2H), 2.36 (s, 3H), 2.28 (dd,  $J = 10.4, 13.2$  Hz,

1H); <sup>13</sup>C NMR (100 MHz, CDCl<sub>3</sub>) δ 177.2, 138.8, 138.3, 132.9, 128.8, 128.6, 126.8, 123.0, 119.7, 75.1, 53.4, 43.5, 38.2, 32.8, 21.6; IR (neat): 1775, 1171, 1015, 925 cm<sup>-1</sup>; HRMS (FAB) calcd for C<sub>15</sub>H<sub>18</sub>BrO<sub>2</sub>: 309.0490 ([M+H]<sup>+</sup>), found 309.0491.



**2j: (Major diastereomer):**  $[\alpha]_{\text{D}}^{21} -8.3$  ( $c = 1.2$ , CHCl<sub>3</sub>, 86:14 er); HPLC analysis: Daicel Chiralpak IC-3, hexane/2-propanol = 20:1, flow rate = 0.5 mL/min, 214 nm; retention time: 28.0 min (minor) and 31.5 min (major). <sup>1</sup>H NMR (400 MHz, CDCl<sub>3</sub>) δ 7.57 (dt,  $J = 1.6, 8.0$  Hz, 1H), 7.33–7.28 (m, 1H), 7.17–7.07 (m, 2H), 5.88–5.78 (m, 1H), 5.31–5.23 (m, 2H), 4.73–4.66 (m, 1H), 3.55 (dd,  $J = 5.6, 10.4$  Hz, 1H), 3.36 (dd,  $J = 7.6, 10.8$  Hz, 1H), 2.86–2.75 (m, 3H), 2.40 (ddd,  $J = 2.0, 8.0, 14.0$  Hz, 1H); <sup>13</sup>C NMR (100 MHz, CDCl<sub>3</sub>) δ 177.1, 160.4 (d,  $J = 245$  Hz), 131.7, 129.5 (d,  $J = 9.6$  Hz), 128.9 (d,  $J = 11.5$  Hz), 127.6 (d,  $J = 3.8$  Hz), 124.3 (d,  $J = 2.9$  Hz), 120.9, 116.4 (d,  $J = 23.0$  Hz), 75.7, 49.6, 41.4, 40.0 (d,  $J = 2.8$  Hz), 33.2; IR (neat): 1772, 1489, 1179, 757 cm<sup>-1</sup>; HRMS (FAB) calcd for C<sub>14</sub>H<sub>15</sub>BrFO<sub>2</sub>: 313.0239 ([M+H]<sup>+</sup>), found 313.0239. **(Minor diastereomer):**  $[\alpha]_{\text{D}}^{22} +32.2$  ( $c = 0.17$ , CHCl<sub>3</sub>, 74:26 er); HPLC analysis: Daicel Chiralpak IC-3, hexane/2-propanol = 20:1, flow rate = 0.5 mL/min, 214 nm; retention time: 18.7 min (major) and 19.6 min (minor). <sup>1</sup>H NMR (400 MHz, CDCl<sub>3</sub>) δ 7.34–7.25 (m, 2H), 7.15–7.09 (m, 2H), 5.83–5.72 (m, 1H), 5.22–5.18 (m, 2H), 4.49–4.42 (m, 1H), 3.57 (dd,  $J = 5.2, 10.8$  Hz, 1H), 3.48 (dd,  $J = 6.4, 10.8$  Hz, 1H), 2.86–2.76 (m, 3H), 2.39 (dd,  $J = 10.4, 13.6$  Hz, 1H); <sup>13</sup>C NMR (100 MHz, CDCl<sub>3</sub>) δ 176.6, 160.7 (d,  $J = 246$  Hz), 132.8, 129.8 (d,  $J = 8.6$  Hz), 128.2 (d,  $J = 3.8$  Hz), 127.1 (d,  $J = 11.5$  Hz), 124.6 (d,  $J = 2.8$  Hz), 120.4, 116.9 (d,  $J = 23.0$  Hz), 75.7, 52.3 (d,  $J = 1.9$  Hz), 40.2 (d,  $J = 3.9$  Hz), 38.3 (d,  $J = 4.8$  Hz), 32.7; IR (neat): 1781, 1491, 1178, 1018, 758 cm<sup>-1</sup>; HRMS (FAB) calcd for C<sub>14</sub>H<sub>15</sub>BrFO<sub>2</sub>: 313.0239 ([M+H]<sup>+</sup>), found 313.0239.



**2k:**  $[\alpha]_{\text{D}}^{27} +61.0$  ( $c = 1.8$ , CHCl<sub>3</sub>, 95: 5 er); HPLC analysis: Daicel Chiralpak IA-3, hexane/2-propanol = 20:1, flow rate = 0.5 mL/min, 214 nm; retention time: 22.3 min (major) and 26.8 min (minor). <sup>1</sup>H NMR (400 MHz, CDCl<sub>3</sub>) δ 7.90–7.79 (m, 4H), 7.56–7.48 (m, 3H), 5.74–5.64 (m, 1H), 5.16–5.13 (m, 2H), 4.50–4.44 (m, 1H), 3.60 (dd,  $J = 5.2, 10.8$  Hz, 1H), 3.51 (dd,  $J = 6.8, 10.8$  Hz, 1H), 2.93 (dd,  $J = 5.2, 13.2$  Hz, 1H), 2.78 (d,  $J = 6.8$  Hz, 2H), 2.38 (dd,  $J = 10.8, 13.2$  Hz, 1H); <sup>13</sup>C NMR (100 MHz, CDCl<sub>3</sub>) δ 177.1, 135.6, 133.1,

132.7, 132.6, 129.1, 128.1, 127.5, 126.6, 126.5, 125.0, 123.9, 119.8, 75.2, 53.7, 43.4, 38.3, 32.8; IR (neat): 1769, 1173, 1014, 1005, 923, 817, 748  $\text{cm}^{-1}$ ; HRMS (FAB) calcd for  $\text{C}_{18}\text{H}_{18}\text{BrO}_2$ : 345.0490 ( $[\text{M}+\text{H}]^+$ ), found 345.0490.



**2l:**  $[\alpha]_{\text{D}}^{20} +27.9$  ( $c = 1.3$ ,  $\text{CHCl}_3$ , 95: 5 er); HPLC analysis: Daicel Chiralpak IA-3, hexane/2-propanol = 20:1, flow rate = 0.5 mL/min, 214 nm; retention time: 17.7 min (major) and 20.3 min (minor).  $^1\text{H}$  NMR (400 MHz,  $\text{CDCl}_3$ )  $\delta$  7.27 (dd,  $J = 1.2, 5.2$  Hz, 1H), 7.05 (dd,  $J = 1.2, 3.6$  Hz, 1H), 6.99 (dd,  $J = 3.6, 5.2$  Hz, 1H), 5.73–5.62 (m, 1H), 5.18–5.13 (m, 2H), 4.70–4.63 (m, 1H), 3.60 (dd,  $J = 4.8, 10.8$  Hz, 1H), 3.52 (dd,  $J = 6.4, 10.8$  Hz, 1H), 2.80–2.69 (m, 3H), 2.35 (dd,  $J = 10.4, 13.6$  Hz, 1H);  $^{13}\text{C}$  NMR (100 MHz,  $\text{CDCl}_3$ )  $\delta$  176.1, 142.5, 132.2, 127.3, 125.2, 125.1, 120.1, 75.5, 50.8, 44.4, 39.5, 32.8; IR (neat): 1768, 1173, 1010, 926, 703  $\text{cm}^{-1}$ ; HRMS (FAB) calcd for  $\text{C}_{12}\text{H}_{13}\text{BrO}_2\text{S}$ : 299.9820 ( $[\text{M}]^+$ ), found 299.9820.



**2m:**  $[\alpha]_{\text{D}}^{20} +41.6$  ( $c = 0.92$ ,  $\text{CHCl}_3$ , 96: 4 er); HPLC analysis: Daicel Chiralpak IA-3, hexane/2-propanol = 20:1, flow rate = 0.5 mL/min, 214 nm; retention time: 20.4 min (major) and 24.1 min (minor).  $^1\text{H}$  NMR (400 MHz,  $\text{CDCl}_3$ )  $\delta$  7.37 (dd,  $J = 2.8, 5.2$  Hz, 1H), 7.21 (dd,  $J = 1.2, 2.8$  Hz, 1H), 7.14 (dd,  $J = 1.2, 5.2$  Hz, 1H), 5.69–5.59 (m, 1H), 5.15–5.10 (m, 2H), 4.58–4.51 (m, 1H), 3.60 (dd,  $J = 4.8, 10.8$  Hz, 1H), 3.50 (dd,  $J = 6.4, 10.4$  Hz, 1H), 2.76–2.63 (m, 3H), 2.27 (dd,  $J = 10.4, 13.2$  Hz, 1H);  $^{13}\text{C}$  NMR (100 MHz,  $\text{CDCl}_3$ )  $\delta$  177.0, 139.3, 132.5, 127.1, 125.9, 121.5, 119.8, 75.4, 50.8, 43.1, 38.5, 32.9; IR (neat): 1774, 1173, 1016, 927, 789  $\text{cm}^{-1}$ ; HRMS (FAB) calcd for  $\text{C}_{12}\text{H}_{14}\text{BrO}_2\text{S}$ : 300.9898 ( $[\text{M}+\text{H}]^+$ ), found 300.9899.



**2n: (Major diastereomer):**  $[\alpha]_{\text{D}}^{27} +3.6$  ( $c = 0.40$ ,  $\text{CHCl}_3$ , 85:15 er); HPLC analysis: Daicel Chiralpak IA-3, hexane/2-propanol = 20:1, flow rate = 0.5 mL/min, 214 nm; retention time: 17.5 min (major) and 18.4 min (minor).  $^1\text{H}$  NMR (400 MHz,  $\text{CDCl}_3$ )  $\delta$  7.29 (tt,  $J = 1.6, 7.2$  Hz, 2H), 7.22–7.18 (m, 3H), 5.85–5.75 (m, 1H), 5.25–5.19 (m, 2H), 4.64–4.57 (m, 1H), 3.57 (dd,  $J = 4.4, 10.8$  Hz, 1H), 3.50 (dd,  $J = 6.4, 10.8$  Hz, 1H), 2.81–2.73 (m, 1H), 2.59–2.52 (m, 1H), 2.46–2.30 (m, 3H), 2.13 (dd,  $J = 9.2, 13.2$  Hz, 1H), 2.00–1.88 (m, 2H);  $^{13}\text{C}$  NMR (100 MHz,  $\text{CDCl}_3$ )  $\delta$  179.2, 141.1, 132.0, 128.5, 128.3, 126.2, 120.2, 74.8, 48.3, 41.7, 38.4, 36.2,

34.0, 30.8; IR (neat): 3027, 2925, 1768, 1176, 1020, 925, 700  $\text{cm}^{-1}$ ; HRMS (FAB) calcd for  $\text{C}_{16}\text{H}_{19}\text{BrO}_2$ : 322.0568 ( $[\text{M}]^+$ ), found 322.0568. **(Minor diastereomer)**:  $[\alpha]_{\text{D}}^{27} -9.2$  ( $c = 0.56$ ,  $\text{CHCl}_3$ , 86:14 er); HPLC analysis: Daicel Chiralpak IA-3, hexane/2-propanol = 20:1, flow rate = 0.5 mL/min, 214 nm; retention time: 19.2 min (major) and 21.9 min (minor).  $^1\text{H}$  NMR (400 MHz,  $\text{CDCl}_3$ )  $\delta$  7.29 (tt,  $J = 1.6, 7.4$  Hz, 2H), 7.21 (tt,  $J = 1.6, 7.4$  Hz, 1H), 7.16 (dd,  $J = 1.2, 8.0$  Hz, 2H), 5.80–5.70 (m, 1H), 5.23–5.18 (m, 2H), 4.68–4.61 (m, 1H), 3.57 (dd,  $J = 4.8, 10.8$  Hz, 1H), 3.45 (dd,  $J = 6.4, 10.8$  Hz, 1H), 2.74–2.61 (m, 2H), 2.51 (tdd,  $J = 1.2, 6.4, 14.0$  Hz, 1H), 2.42 (dd,  $J = 8.4, 14.0$  Hz, 1H), 2.28 (dd,  $J = 7.2, 13.6$  Hz, 1H), 2.14 (dd,  $J = 8.8, 13.6$  Hz, 1H), 1.97–1.85 (m, 2H);  $^{13}\text{C}$  NMR (100 MHz,  $\text{CDCl}_3$ )  $\delta$  179.0, 140.8, 132.6, 128.6, 128.2, 126.3, 120.1, 75.2, 47.9, 40.4, 39.1, 36.9, 33.8, 30.6; IR (neat): 2922, 1769, 1456, 1165, 1017, 924, 746, 700  $\text{cm}^{-1}$ ; HRMS (FAB) calcd for  $\text{C}_{16}\text{H}_{19}\text{BrO}_2$ : 322.0568 ( $[\text{M}]^+$ ), found 322.0568.



**2o: (1.3: 1 mixture of diastereomers)**:  $[\alpha]_{\text{D}}^{26} -9.2$  ( $c = 2.3$ ,  $\text{CHCl}_3$ , 78:22 er for major diastereomer, 76:24 er for minor diastereomer); HPLC analysis: Daicel Chiralpak IG-3, hexane/2-propanol = 20:1, flow rate = 0.5 mL/min, 214 nm; retention time for major diastereomer: 24.8 min (major) and 29.6 min (minor); retention time for minor diastereomer: 24.0 min (minor) and 30.6 min (major).  $^1\text{H}$  NMR (400 MHz,  $\text{CDCl}_3$ )  $\delta$  7.34–7.25 (m, 3H), 7.22–7.18 (m, 2H), 5.86–5.72 (m, 1H), 5.24–5.17 (m, 2H), 4.48–4.41 (m, 0.44H), 3.47–3.40 (m, 0.56H), 3.33 (dd,  $J = 4.4, 10.4$  Hz, 0.56H), 3.26 (dd,  $J = 6.4, 10.4$  Hz, 0.56H), 3.19 (d, 13.2 Hz, 0.44H), 3.08–3.04 (m, 1H), 2.75–2.69 (m, 1H), 2.63–2.51 (m, 1.44H), 2.39–2.18 (m, 2H), 2.09–2.03 (m, 1H);  $^{13}\text{C}$  NMR (100 MHz,  $\text{CDCl}_3$ )  $\delta$  179.64, 179.55, 136.5, 136.0, 132.6, 132.1, 130.3, 129.7, 128.74, 128.65, 127.4, 127.2, 120.4, 120.3, 75.1, 74.9, 50.1, 50.0, 43.8, 43.1, 42.5, 42.3, 34.8, 33.8, 33.1; IR (neat): 3030, 2978, 2921, 1769, 1170, 1013, 924, 703  $\text{cm}^{-1}$ ; HRMS (FAB) calcd for  $\text{C}_{15}\text{H}_{17}\text{BrO}_2$ : 308.0412 ( $[\text{M}]^+$ ), found 308.0413.



**8:**  $[\alpha]_{\text{D}}^{27} +70.2$  ( $c = 1.3$ ,  $\text{CHCl}_3$ , 94: 6 er); HPLC analysis: Daicel Chiralpak IA-3, hexane/2-propanol = 50:1, flow rate = 0.5 mL/min, 214 nm; retention time: 37.5 min (minor) and 41.0 min (major).  $^1\text{H}$  NMR (400 MHz,  $\text{CDCl}_3$ )  $\delta$  7.40–7.24 (m, 10H), 4.59–4.53 (m, 1H), 3.62 (dd,  $J = 4.8, 10.8$  Hz, 1H), 3.52 (dd,  $J = 6.4, 10.8$  Hz, 1H), 3.17 (dd,  $J = 5.2, 13.2$  Hz, 1H), 2.83 (dd,  $J = 9.6, 13.2$

Hz, 1H);  $^{13}\text{C}$  NMR (100 MHz,  $\text{CDCl}_3$ )  $\delta$  176.2, 141.4, 139.3, 129.0, 128.5, 127.9, 127.6, 127.4, 127.2, 74.9, 58.2, 42.2, 32.6; IR (neat): 1778, 1168, 1026, 965, 697  $\text{cm}^{-1}$ ; HRMS (FAB) calcd for  $\text{C}_{17}\text{H}_{15}\text{BrO}_2$ : 330.0255 ( $[\text{M}]^+$ ), found 330.0255.

#### 4. Transformations of products **2a** and **8**

To a solution of **2a** (0.20 mmol) in THF (5 mL) was added 10wt% Pd/C (0.030 mmol). The reaction mixture was warmed to 60 °C and stirred for 4 h under  $\text{H}_2$  atmosphere. After 4 h, the reaction mixture was diluted with ethyl acetate and filtered over celite. The filtrate was concentrated and purified by flash column chromatography on silica gel (hexane/ethyl acetate = 50:1–5:1 as eluent) to give product **9**.



**9**:  $[\alpha]_D^{21} +38.5$  ( $c = 1.5$ ,  $\text{CHCl}_3$ , 95: 5 v/v); HPLC analysis: Daicel Chiralpak IA-3, hexane/2-propanol = 20:1, flow rate = 0.5 mL/min, 214 nm; retention time: 15.8 min (major) and 18.0 min (minor).  $^1\text{H}$  NMR (400 MHz,  $\text{CDCl}_3$ )  $\delta$  7.43–7.28 (m, 5H), 4.46–4.40 (m, 1H), 3.60 (dd,  $J = 4.8, 10.8$  Hz, 1H), 3.51 (dd,  $J = 6.4, 10.8$  Hz, 1H), 2.91 (dd,  $J = 5.2, 13.2$  Hz, 1H), 2.22 (dd,  $J = 10.4, 13.2$  Hz, 1H), 2.01 (ddd,  $J = 4.8, 12.4, 14.0$  Hz, 1H), 1.83 (ddd,  $J = 4.8, 12.4, 14.0$  Hz, 1H), 1.37–1.11 (m, 2H), 0.88 (t,  $J = 7.2$  Hz, 3H);  $^{13}\text{C}$  NMR (100 MHz,  $\text{CDCl}_3$ )  $\delta$  177.7, 138.3, 128.9, 127.7, 126.1, 74.9, 53.5, 41.6, 38.7, 33.0, 18.1, 14.2; IR (neat): 2960, 2933, 2872, 1773, 1178, 1002, 699  $\text{cm}^{-1}$ ; HRMS (FAB) calcd for  $\text{C}_{14}\text{H}_{17}\text{BrO}_2$ : 296.0412 ( $[\text{M}]^+$ ), found 296.0412.

To a solution of **9** (0.16 mmol) in toluene (8 mL) was added 2,2'-azobis(isobutyronitrile) (AIBN) (0.048 mmol) and tributyltin hydride (0.48 mmol). The reaction mixture was warmed to 100 °C and stirred for 22 h. After 22 h, the reaction mixture was cooled to room temperature and quenched with saturated aqueous  $\text{NaHCO}_3$  (15 mL). The organic materials were extracted with ethyl acetate for three times (5 mL  $\times$  3). The combined extracts were dried over  $\text{Na}_2\text{SO}_4$  and concentrated. The residue was purified by flash column chromatography on silica gel (hexane/ethyl acetate = 70:1–10:1 as eluent) to give product **10**.



**10:**<sup>3</sup>  $[\alpha]_D^{18} +57.8$  ( $c = 1.4$ ,  $\text{CHCl}_3$ , 95: 5 er); HPLC analysis: Daicel Chiralpak ID-3, hexane/2-propanol = 20:1, flow rate = 0.5 mL/min, 214 nm; retention time: 20.7 min (major) and 22.3 min (minor). <sup>1</sup>H NMR (400 MHz,  $\text{CDCl}_3$ )  $\delta$  7.42 (d,  $J = 7.6$  Hz, 2H), 7.36 (t,  $J = 7.6$  Hz, 2H), 7.28 (t,  $J = 7.2$  Hz, 1H), 4.40–4.31 (m, 1H), 2.81 (dd,  $J = 4.8, 13.2$  Hz, 1H), 2.02–1.94 (m, 2H), 1.79 (ddd,  $J = 4.8, 12.4, 14.0$  Hz, 1H), 1.42 (d,  $J = 6.0$  Hz, 3H), 1.36–1.08 (m, 2H), 0.87 (t,  $J = 7.2$  Hz, 3H); <sup>13</sup>C NMR (100 MHz,  $\text{CDCl}_3$ )  $\delta$  178.9, 138.8, 128.8, 127.4, 126.3, 73.7, 53.9, 41.9, 41.8, 20.5, 18.1, 14.2; IR (neat): 2960, 2933, 2872, 1761, 1184  $\text{cm}^{-1}$ ; HRMS (FAB) calcd for  $\text{C}_{14}\text{H}_{18}\text{O}_2$ : 218.1307 ( $[\text{M}]^+$ ), found 218.1307.

To a solution of **2a** (0.10 mmol) in  $\text{CH}_3\text{CN}$  (1 mL) was added benzylamine (0.50 mmol). The reaction mixture was warmed to 70 °C and stirred for 48 h. After 48 h, the reaction mixture was concentrated. The residue was purified by flash column chromatography on silica gel (hexane/ethyl acetate = 30:1–1:1 as eluent) to give product **11**.



**11:**  $[\alpha]_D^{20} +29.1$  ( $c = 1.3$ ,  $\text{CHCl}_3$ , 95: 5 er); HPLC analysis: Daicel Chiralpak IA-3, hexane/2-propanol = 3:1, flow rate = 0.5 mL/min, 214 nm; retention time: 12.6 min (minor) and 13.9 min (major). <sup>1</sup>H NMR (400 MHz,  $\text{CDCl}_3$ )  $\delta$  7.42–7.22 (m, 10H), 5.69–5.58 (m, 1H), 5.11–5.06 (m, 2H), 4.45–4.38 (m, 1H), 3.81 (s, 2H), 2.90 (dd,  $J = 3.6, 12.8$  Hz, 1H), 2.82 (dd,  $J = 6.8, 13.2$  Hz, 1H), 2.67 (d,  $J = 7.2$  Hz, 2H), 2.60 (dd,  $J = 5.2, 13.2$  Hz, 1H), 2.28 (dd,  $J = 10.8, 13.2$  Hz, 1H); <sup>13</sup>C NMR (100 MHz,  $\text{CDCl}_3$ )  $\delta$  178.0, 139.8, 138.6, 133.1, 128.9, 128.4, 128.1, 127.7, 127.1, 126.2, 119.4, 77.1, 53.8, 53.0, 52.5, 43.5, 36.6; IR (neat): 2920, 2833, 1764, 1181, 1014, 923, 740, 699  $\text{cm}^{-1}$ ; HRMS (FAB) calcd for  $\text{C}_{21}\text{H}_{23}\text{NO}_2$ : 321.1729 ( $[\text{M}]^+$ ), found 321.1729.

To a solution of **2a** (0.10 mmol) in  $\text{CH}_3\text{CN}$  (1 mL) was added  $\text{K}_2\text{CO}_3$  (0.30 mmol) and thiophenol (0.50 mmol). The reaction mixture was warmed to 75 °C and stirred for 3 h. After 3 h, the reaction mixture was cooled to room temperature and quenched with saturated aqueous  $\text{NH}_4\text{Cl}$  (5 mL). The organic materials were extracted with ethyl acetate for three times (5 mL  $\times$  3). The combined extracts were dried over

Na<sub>2</sub>SO<sub>4</sub> and concentrated. The residue was purified by flash column chromatography on silica gel (hexane/ethyl acetate = 80:1–5:1 as eluent) to give product **12**.



**12**: [ $\alpha$ ]<sup>19</sup><sub>D</sub> +73.1 (*c* = 1.7, CHCl<sub>3</sub>, 95: 5 er); HPLC analysis: Daicel Chiralpak IA-3, hexane/2-propanol = 20:1, flow rate = 0.5 mL/min, 214 nm; retention time: 19.5 min (major) and 21.0 min (minor). <sup>1</sup>H NMR (400 MHz, CDCl<sub>3</sub>)  $\delta$  7.39–7.20 (m, 10H), 5.67–5.57 (m, 1H), 5.12–5.04 (m, 2H), 4.41–4.34 (m, 1H), 3.37 (dd, *J* = 4.8, 13.2 Hz, 1H), 3.07 (dd, *J* = 7.6, 13.6 Hz, 1H), 2.80 (dd, *J* = 5.2, 13.2 Hz, 1H), 2.71–2.61 (m, 2H), 2.20 (dd, *J* = 10.8, 13.2 Hz, 1H); <sup>13</sup>C NMR (100 MHz, CDCl<sub>3</sub>)  $\delta$  177.5, 138.4, 134.8, 132.9, 130.2, 129.1, 128.9, 127.7, 127.0, 126.1, 119.6, 75.6, 53.1, 43.7, 38.6, 38.4; IR (neat): 3060, 2929, 1771, 1175, 1005, 921, 740, 698 cm<sup>-1</sup>; HRMS (FAB) calcd for C<sub>20</sub>H<sub>20</sub>O<sub>2</sub>S: 324.1184 ([M]<sup>+</sup>), found 324.1183.

**16** was synthesized from **8** in a similar manner for the synthesis of **10**.



**16**:<sup>3</sup> [ $\alpha$ ]<sup>26</sup><sub>D</sub> +102.9 (*c* = 0.25, CHCl<sub>3</sub>, 94: 6 er); HPLC analysis: Daicel Chiralcel OD-3, hexane/2-propanol = 20:1, flow rate = 0.5 mL/min, 214 nm; retention time: 16.7 min (minor) and 17.5 min (major). <sup>1</sup>H NMR (400 MHz, CDCl<sub>3</sub>)  $\delta$  7.39–7.22 (m, 10H), 4.53–4.45 (m, 1H), 3.06 (dd, *J* = 4.8, 12.8 Hz, 1H), 2.60 (dd, *J* = 10.4, 12.8 Hz, 1H), 1.47 (d, *J* = 6.4 Hz, 3H); <sup>13</sup>C NMR (100 MHz, CDCl<sub>3</sub>)  $\delta$  177.2, 142.0, 139.9, 128.9, 128.3, 127.7, 127.6, 127.3, 127.2, 73.6, 58.6, 45.3, 20.4; IR (neat): 1762, 1180, 699 cm<sup>-1</sup>; HRMS (FAB) calcd for C<sub>17</sub>H<sub>16</sub>O<sub>2</sub>: 252.1150 ([M]<sup>+</sup>), found 252.1149.

## 5. General procedure for the synthesis of $\alpha$ -quaternary esters **13**

To a solution of **2** (0.10 mmol) in MeOH (1.0 mL) was added K<sub>2</sub>CO<sub>3</sub> (0.20 mmol) at room temperature. The reaction mixture was stirred for 48 h at 25 °C. After 48 h, the reaction mixture was quenched with H<sub>2</sub>O (10 mL). The organic materials were extracted with ethyl acetate for three times (5 mL  $\times$  3). The combined extracts were dried over Na<sub>2</sub>SO<sub>4</sub> and concentrated. The residue was purified by flash column chromatography on silica gel (hexane/ethyl acetate as eluent) to give product **13**.



**13a:**  $[\alpha]_D^{21} +15.5$  ( $c = 0.76$ ,  $\text{CHCl}_3$ , 95: 5 er); HPLC analysis: Daicel Chiralpak IC-3, hexane/2-propanol = 20:1, flow rate = 0.5 mL/min, 214 nm; retention time: 25.8 min (major) and 38.1 min (minor).  $^1\text{H}$  NMR (400 MHz,  $\text{CDCl}_3$ )  $\delta$  7.37–7.32 (m, 2H), 7.29–7.23 (m, 3H), 5.61–5.51 (m, 1H), 5.13–5.06 (m, 2H), 3.69 (s, 3H), 2.97 (dd,  $J = 7.2, 14.0$  Hz, 1H), 2.90–2.84 (m, 2H), 2.66 (dd,  $J = 4.4, 4.8$  Hz, 1H), 2.40 (dd,  $J = 5.2, 14.4$  Hz, 1H), 2.35 (dd,  $J = 2.8, 5.2$  Hz, 1H), 2.06 (dd,  $J = 6.0, 14.4$  Hz, 1H);  $^{13}\text{C}$  NMR (100 MHz,  $\text{CDCl}_3$ )  $\delta$  175.2, 141.5, 133.1, 128.5, 127.1, 126.2, 119.1, 53.2, 52.2, 49.0, 47.1, 40.3, 38.1; IR (neat): 1731, 1215, 923, 701  $\text{cm}^{-1}$ ; HRMS (FAB) calcd for  $\text{C}_{15}\text{H}_{18}\text{O}_3$ : 246.1256 ( $[\text{M}]^+$ ), found 246.1256.



**13h:**  $[\alpha]_D^{21} +18.7$  ( $c = 2.2$ ,  $\text{CHCl}_3$ , 96: 4 er); HPLC analysis: Daicel Chiralpak IC-3, hexane/2-propanol = 20:1, flow rate = 0.5 mL/min, 214 nm; retention time: 19.7 min (major) and 29.4 min (minor).  $^1\text{H}$  NMR (400 MHz,  $\text{CDCl}_3$ )  $\delta$  7.30–7.23 (m, 3H), 7.13 (td,  $J = 1.6, 7.2$  Hz, 1H), 5.58–5.48 (m, 1H), 5.13–5.07 (m, 2H), 3.70 (s, 3H), 2.96 (dd,  $J = 7.6, 14.0$  Hz, 1H), 2.87–2.82 (m, 2H), 2.68 (dd,  $J = 4.0, 4.8$  Hz, 1H), 2.37 (dd,  $J = 2.4, 5.2$  Hz, 1H), 2.32 (dd,  $J = 5.6, 14.4$  Hz, 1H), 2.11 (dd,  $J = 6.0, 14.4$  Hz, 1H);  $^{13}\text{C}$  NMR (100 MHz,  $\text{CDCl}_3$ )  $\delta$  174.6, 143.5, 134.5, 132.6, 129.7, 127.4, 126.6, 124.6, 119.5, 53.1, 52.4, 48.8, 46.9, 40.1, 37.9; IR (neat): 2952, 2925, 2853, 1731, 1215, 923  $\text{cm}^{-1}$ ; HRMS (FAB) calcd for  $\text{C}_{15}\text{H}_{17}\text{ClO}_3$ : 280.0866 ( $[\text{M}]^+$ ), found 280.0866.



**13i:**  $[\alpha]_D^{23} +9.7$  ( $c = 2.0$ ,  $\text{CHCl}_3$ , 95: 5 er); HPLC analysis: Daicel Chiralpak IF-3, hexane/2-propanol = 20:1, flow rate = 0.5 mL/min, 214 nm; retention time: 19.1 min (minor) and 21.9 min (major).  $^1\text{H}$  NMR (400 MHz,  $\text{CDCl}_3$ )  $\delta$  7.24 (dd,  $J = 1.6, 4.8$  Hz, 1H), 6.99–6.95 (m, 2H), 5.68–5.57 (m, 1H), 5.16–5.08 (m, 2H), 3.73 (s, 3H), 3.00 (dd,  $J = 7.2, 14.0$  Hz, 1H), 2.93–2.87 (m, 2H), 2.69 (dd,  $J = 4.4, 4.8$  Hz, 1H), 2.42 (dd,  $J = 2.8, 4.8$  Hz, 1H), 2.38 (dd,  $J = 5.6, 14.4$  Hz, 1H), 2.20 (dd,  $J = 6.0, 14.4$  Hz, 1H);  $^{13}\text{C}$  NMR (100 MHz,  $\text{CDCl}_3$ )  $\delta$  173.9, 145.4, 132.8, 126.6, 124.8, 124.5, 119.3, 52.5, 51.4, 48.9, 47.0, 42.1, 39.7; IR (neat): 2924, 1732, 1216, 700  $\text{cm}^{-1}$ ; HRMS (FAB) calcd for  $\text{C}_{13}\text{H}_{16}\text{O}_3\text{S}$ : 252.0820 ( $[\text{M}]^+$ ), found 252.0820.

## 6. Determination of the absolute configuration of products

The absolute stereochemistry of products **10** and **16** were confirmed by comparison with reported data.<sup>3</sup>

## References

- 1 (a) R. Nishiyori, A. Tsuchihashi, A. Mochizuki, K. Kaneko, M. Yamanaka and S. Shirakawa, *Chem. – Eur. J.*, 2018, **24**, 16747–16752; (b) A. Tsuchihashi and S. Shirakawa, *Synlett*, 2019, **30**, 1662–1666; (c) M. Okada, K. Kaneko, M. Yamanaka and S. Shirakawa, *Org. Biomol. Chem.*, 2019, **17**, 3747–3751; (d) R. Nishiyori, M. Okada, J. R. J. Maynard and S. Shirakawa, *Asian J. Org. Chem.*, 2021, **10**, 1444–1448.
- 2 (a) M. Wilking, C. G. Daniliuc and U. Hennecke, *Synlett*, 2014, **25**, 1701–1704; (b) C. Aïssa, K. Y. T. Ho, D. J. Tetlow and M. Pin-Nó, *Angew. Chem., Int. Ed.*, 2014, **53**, 4209–4212; (c) G. K. Zieliński, J. Majtczak, M. Gutowski and K. Grela, *J. Org. Chem.*, 2018, **83**, 2542–2553.
- 3 M. Nagamoto and T. Nishimura, *Chem. Commun.*, 2015, **51**, 13466–13469.
- 4 M. T. Knowe, M. W. Danneman, S. Sun, M. Pink and J. N. Johnston, *J. Am. Chem. Soc.*, 2018, **140**, 1998–2001.
- 5 P. De Cointet, P. J. Grossi, C. Pigerol, M. Broll and P. Eymard, *Eur. J. Med. Chem.*, 1980, **15**, 223–227.
- 6 (a) G.-Q. Liu and Y.-M. Li, *J. Org. Chem.*, 2014, **79**, 10094–10109; (b) E. E. Alberto, L. M. Muller and M. R. Detty, *Organometallics*, 2014, **33**, 5571–5581.

# NMR Charts















































































# HPLC Charts
